# Supplementary material
Source: ML conference proceedings conference paper supplement (https://aclanthology.org/2024.wat-1.1)

Heat Map of All Scores

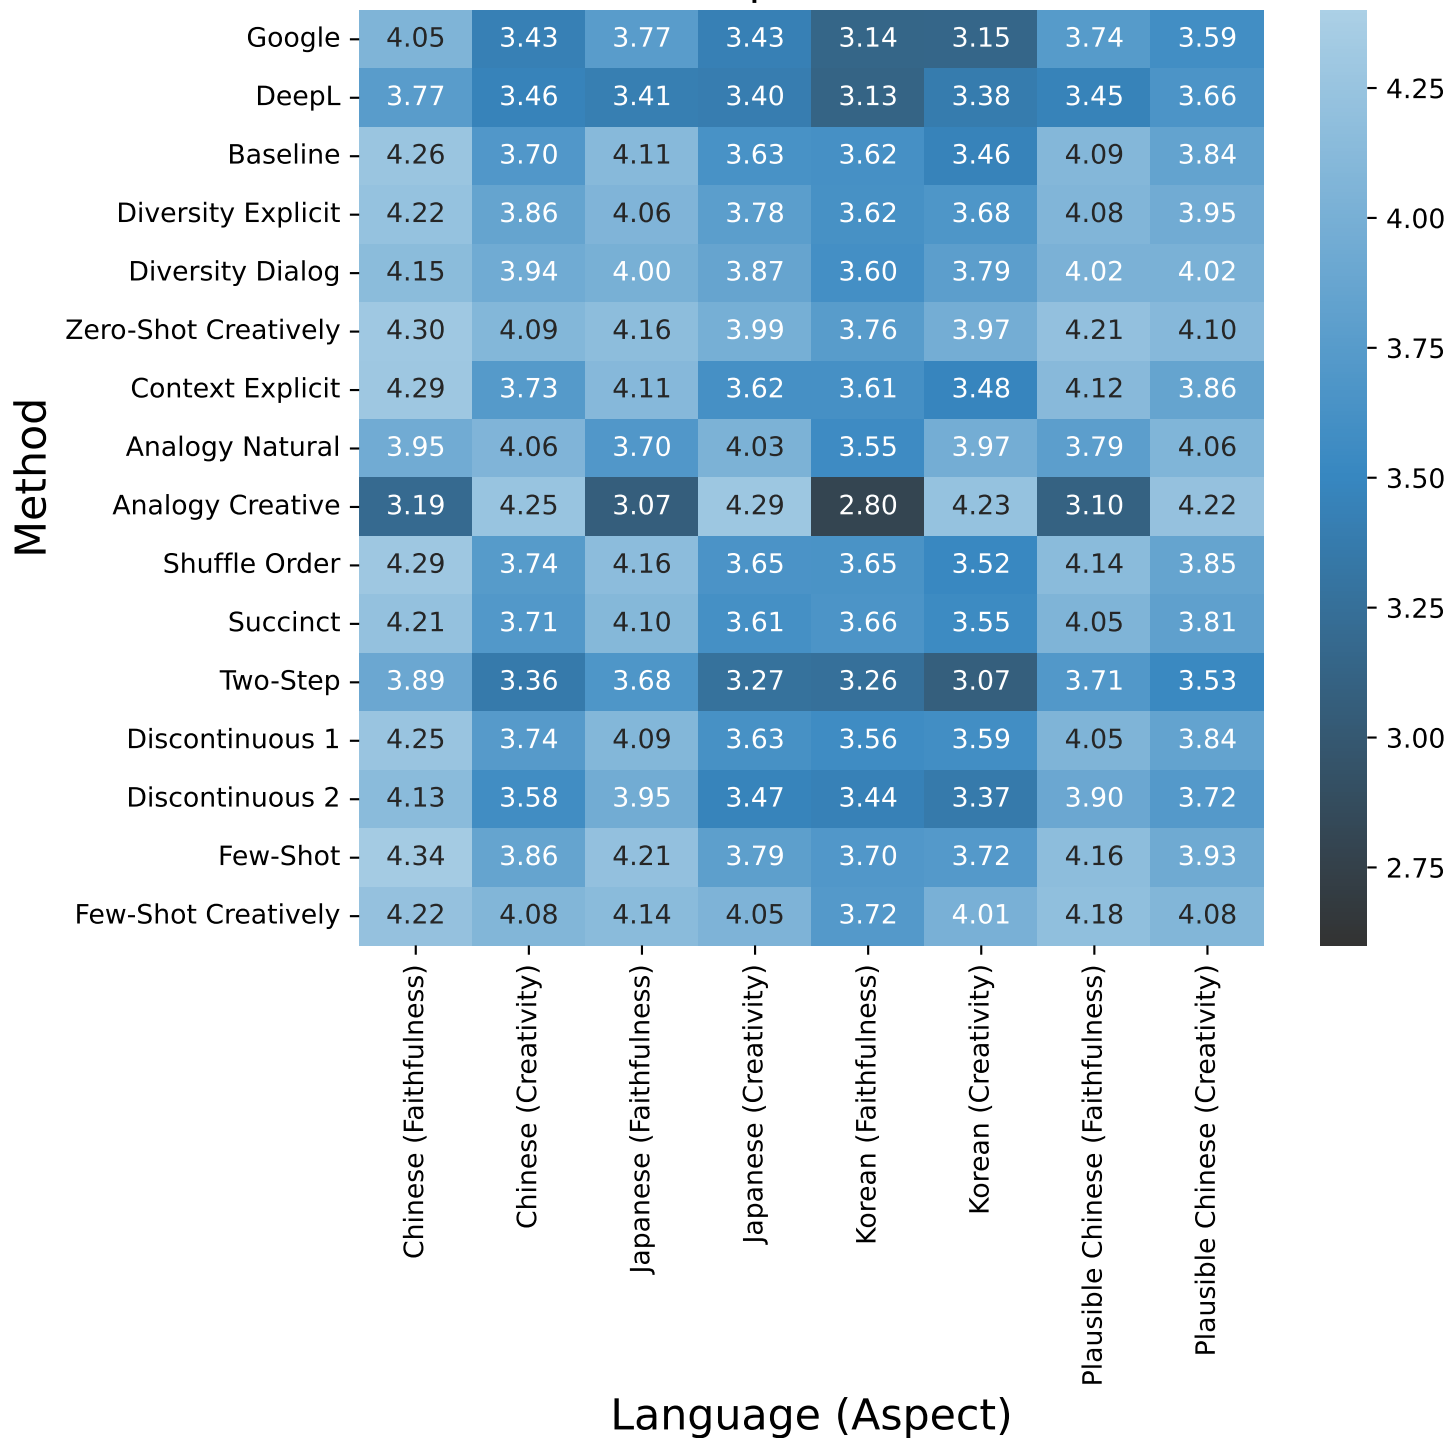

Supplement: SupplementaryMaterial [file 2024.wat-1.1.SupplementaryMaterial.zip]

# Scores for All Methods (Korean)

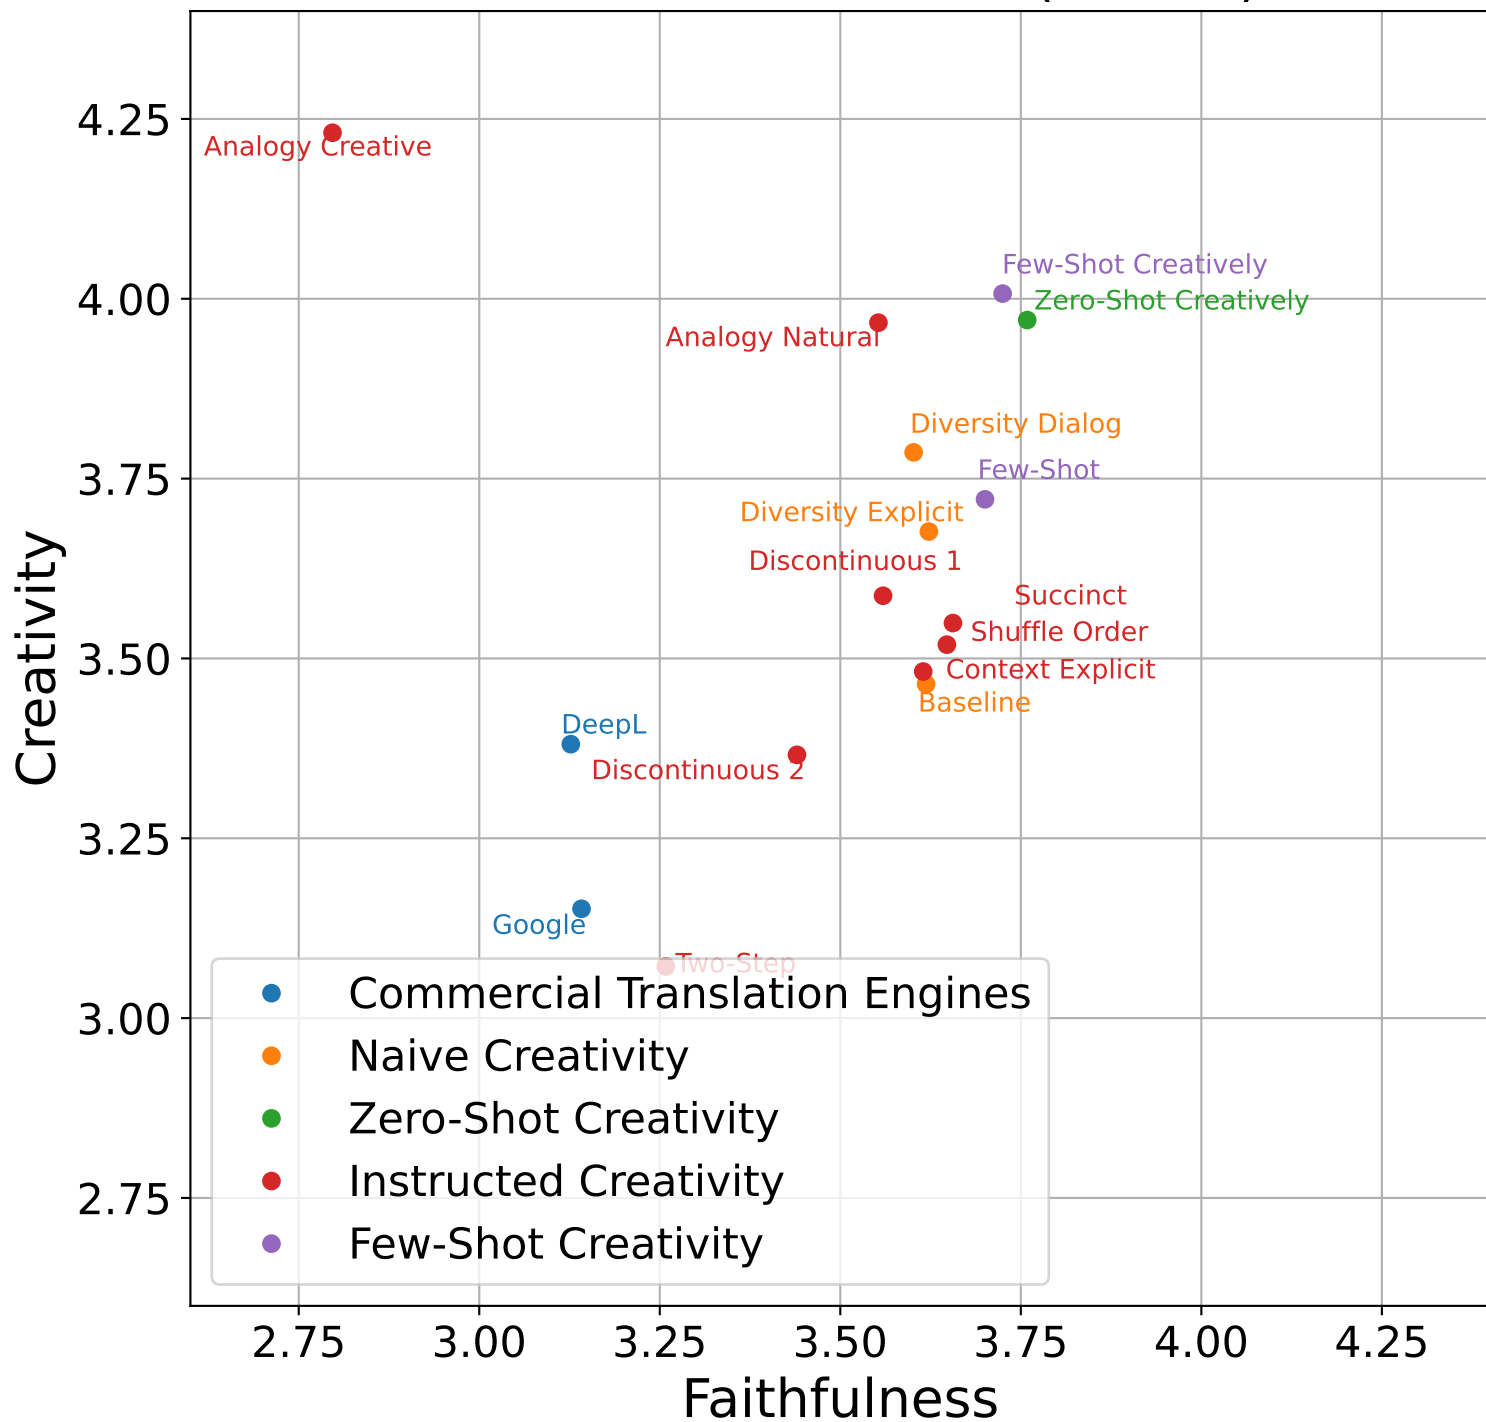

Supplement: SupplementaryMaterial [file 2024.wat-1.1.SupplementaryMaterial.zip]

# Unigram Saturation

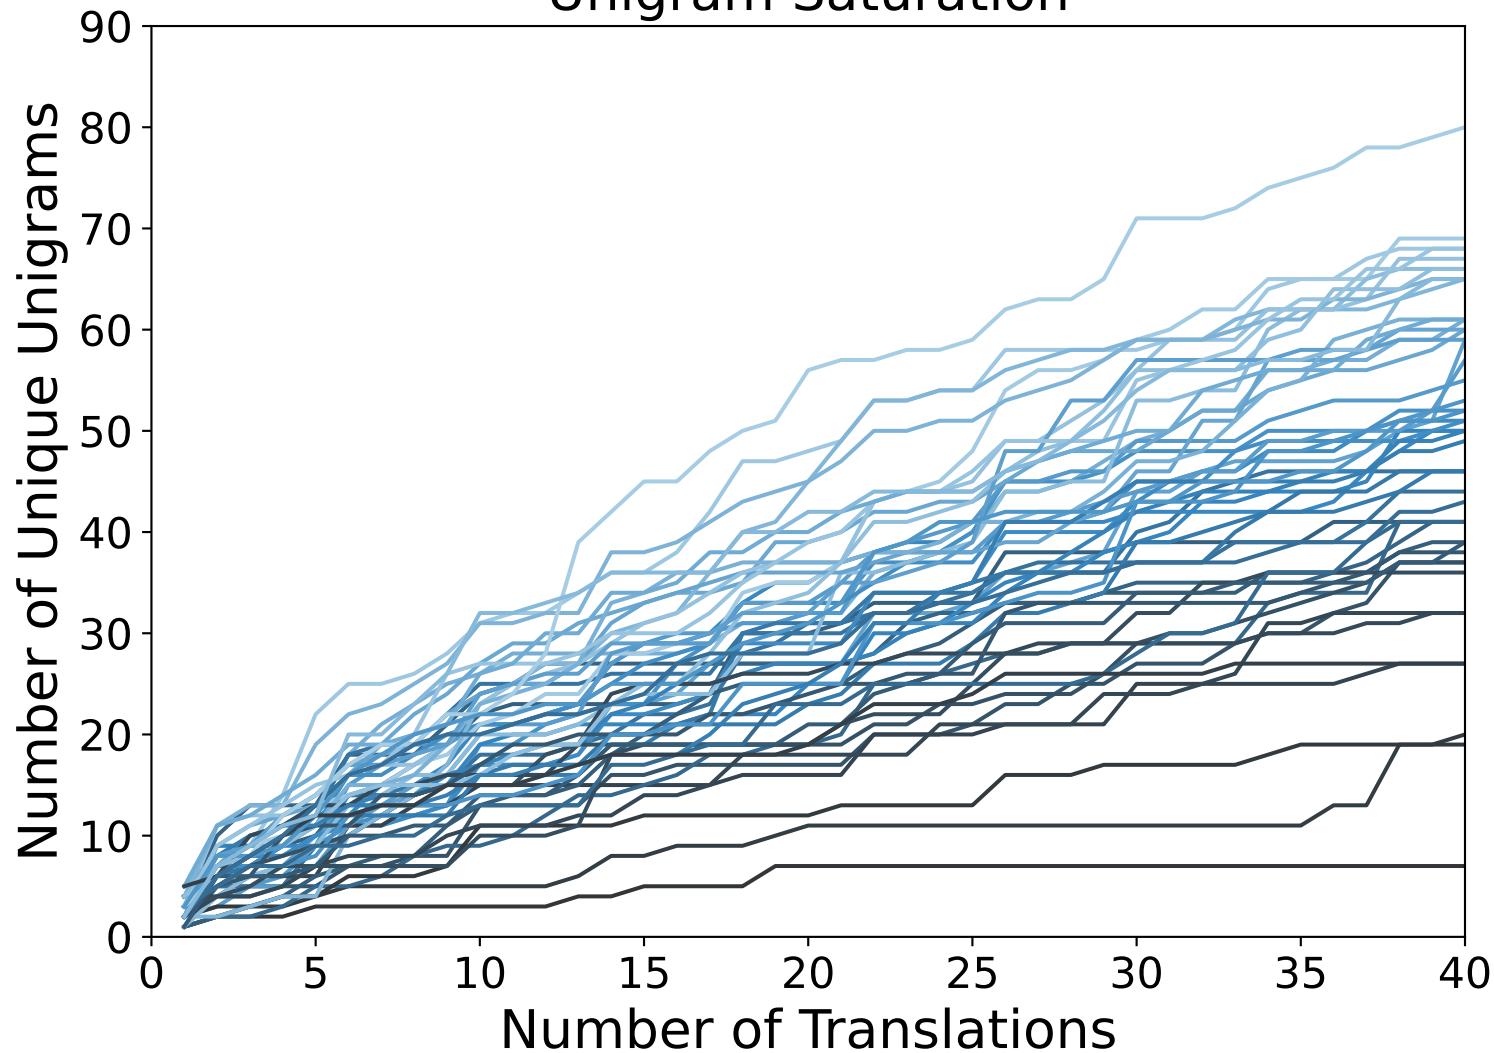

Supplement: SupplementaryMaterial [file 2024.wat-1.1.SupplementaryMaterial.zip]

# Scores for All Methods (Japanese)

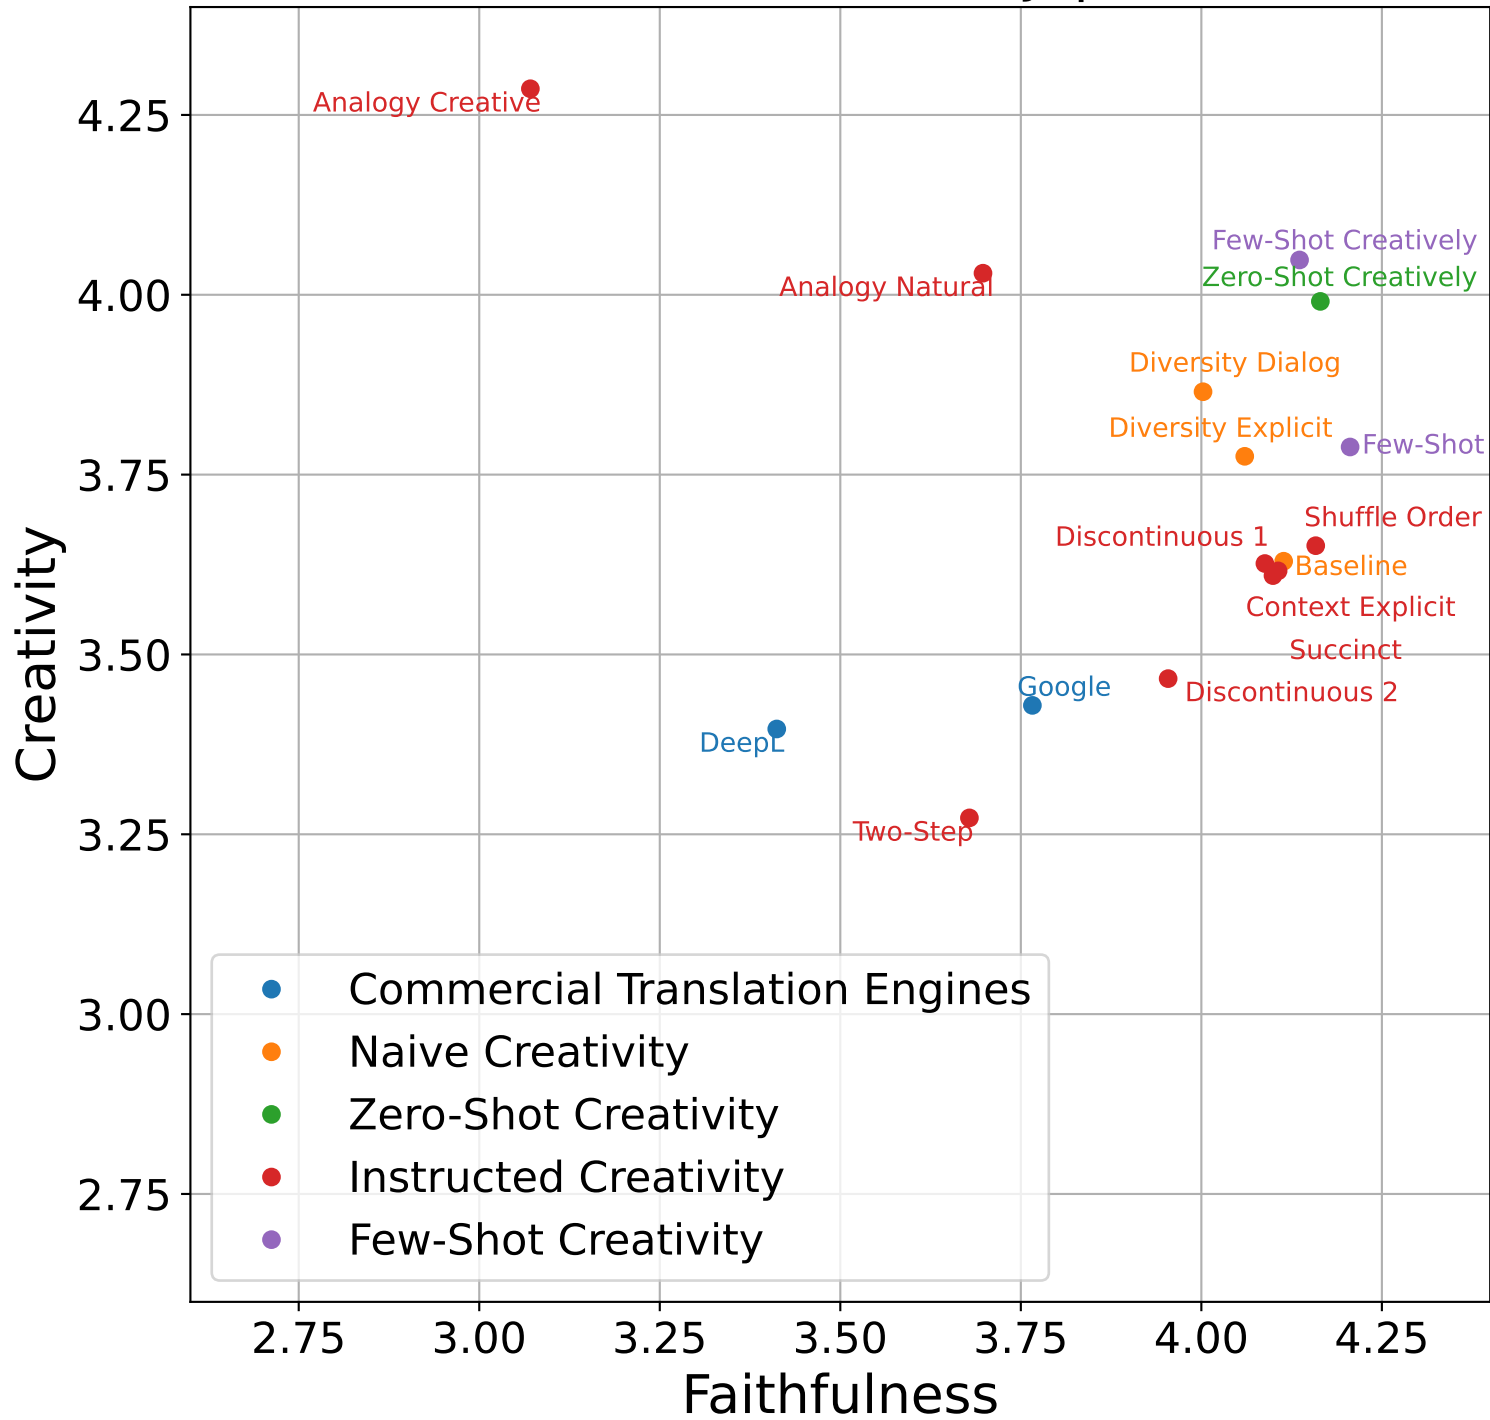

Supplement: SupplementaryMaterial [file 2024.wat-1.1.SupplementaryMaterial.zip]

# Scores for All Methods (Plausible Chinese)

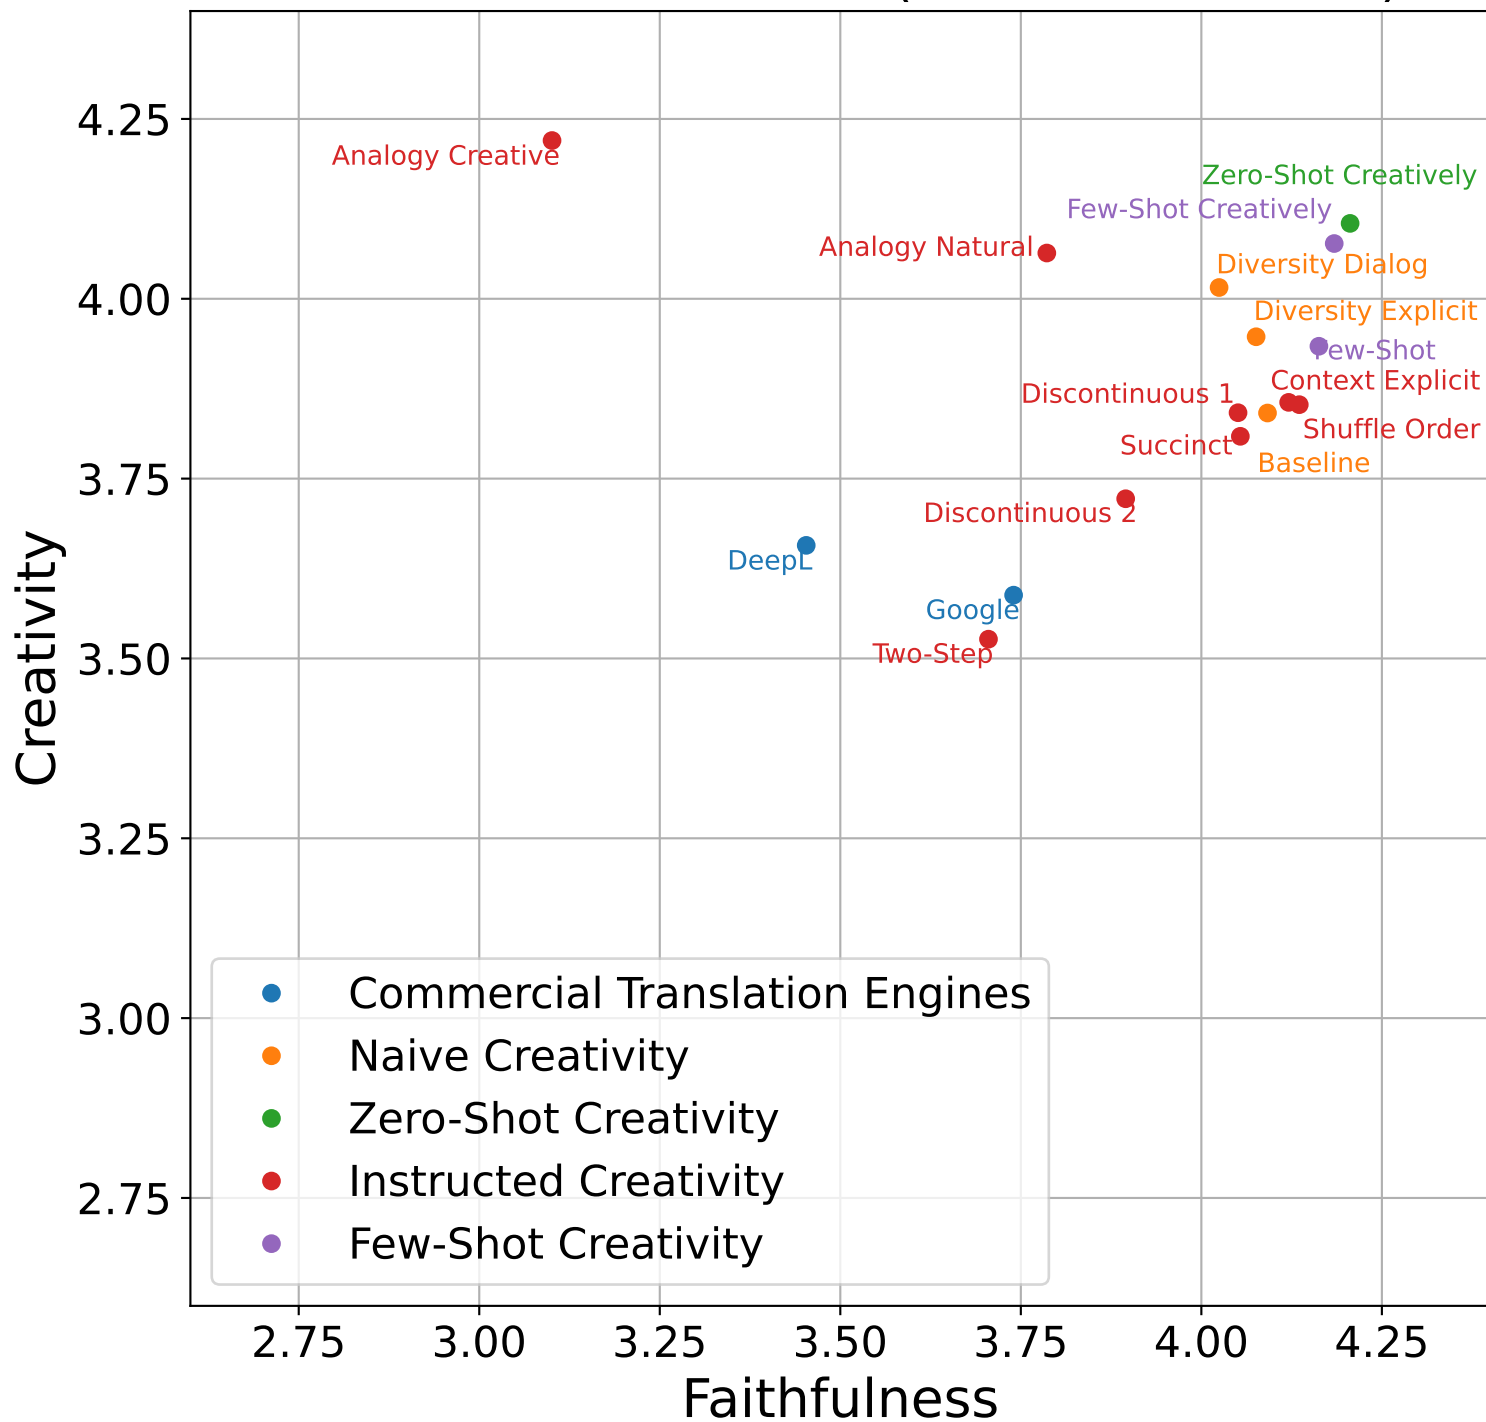

Supplement: SupplementaryMaterial [file 2024.wat-1.1.SupplementaryMaterial.zip]

# Scores for All Methods (Chinese)

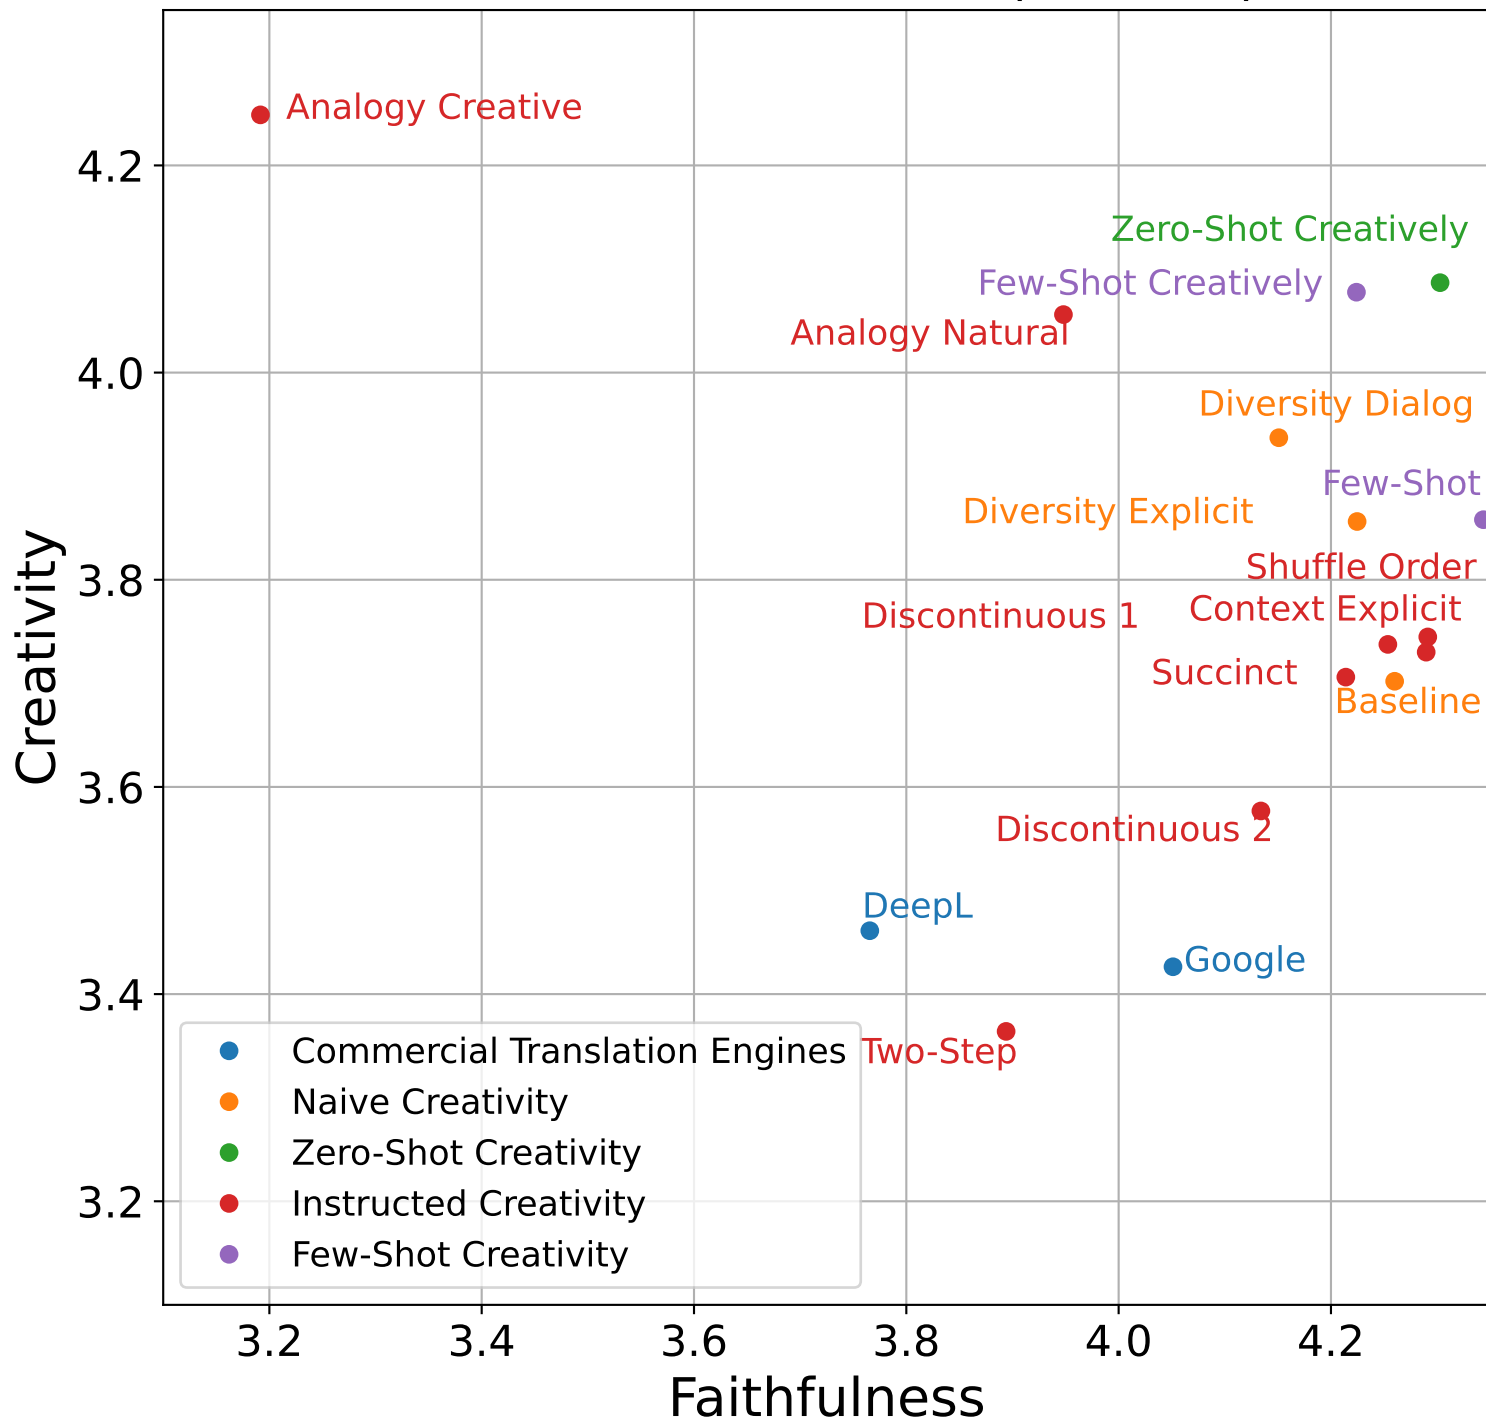

Supplement: SupplementaryMaterial [file 2024.wat-1.1.SupplementaryMaterial.zip]

# Scores for All Methods (Chinese)

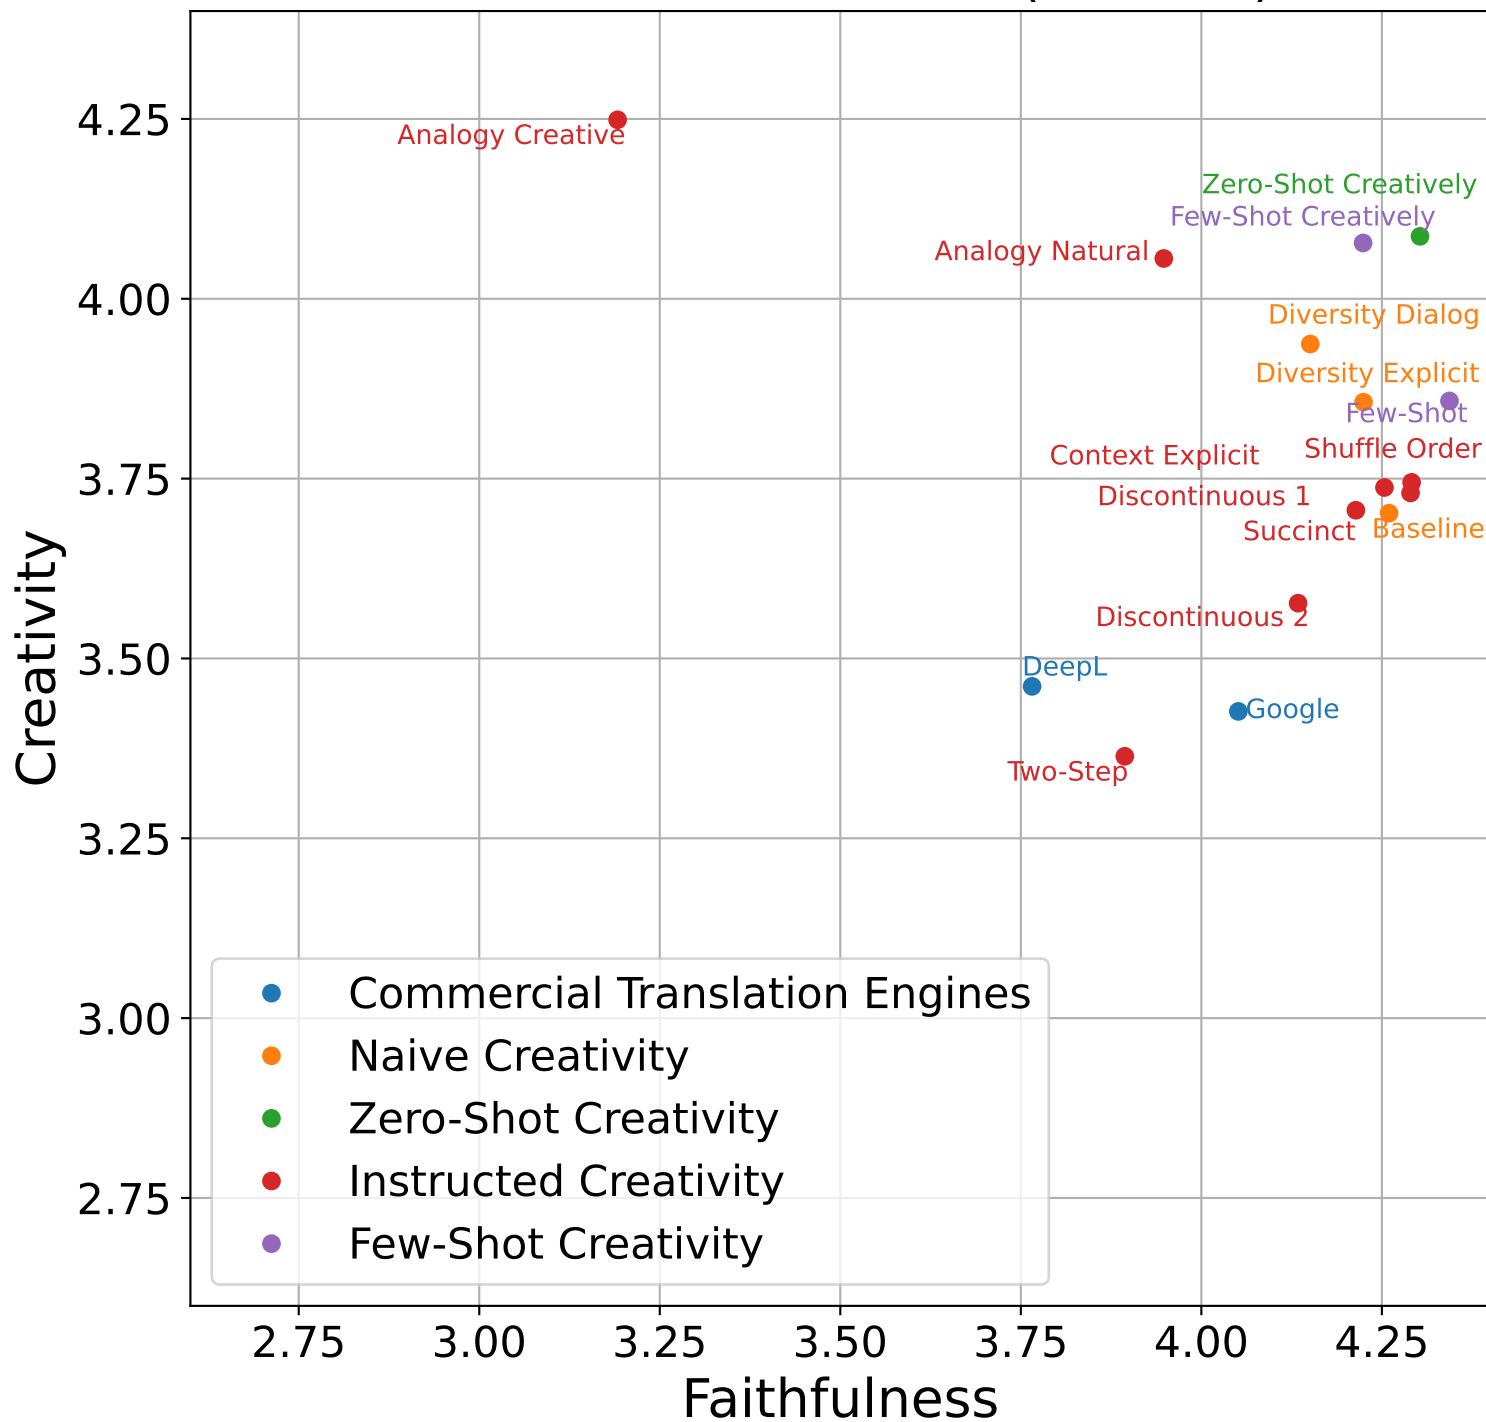

Supplement: SupplementaryMaterial [file 2024.wat-1.1.SupplementaryMaterial.zip]
